# Supplementary material for: Highly sensitive simultaneous detection of mercury and copper ions by ultrasmall fluorescent DNA–Ag nanoclusters
Source: Royal Society of Chemistry journal article supplement (doi:10.1039/c3nj01019h), 2014-01-01
Supplement: c3nj01019h.pdf [file c3nj01019h.pdf]

## Supporting Information

### Highly Sensitive Simultaneous Detection of Mercury and Copper Ions by Ultrasmall Fluorescent DNA-Ag Nanoclusters

Shengliang Li,<sup>a,b,\*</sup> Weipeng Cao,<sup>a,\*</sup> Anil Kumar,<sup>a</sup> Shubin Jin,<sup>a</sup> Yuanyuan Zhao,<sup>a</sup> Chunqiu Zhang,<sup>a</sup> Guozhang Zou,<sup>a</sup> Paul C. Wang,<sup>c</sup> Feng Li,<sup>b,#</sup> Xing-Jie Liang<sup>a,#</sup>

*a* Laboratory of Nanomedicine and Nanosafety, Division of Nanomedicine and Nanobiology, National Center for Nanoscience and Technology of China, and CAS Key Laboratory for Biomedical Effects of Nanomaterials and Nanosafety, Chinese Academy of Sciences, Beijing, 100190, China.

*b* Department of Neurobiology and Anatomy, Zhongshan School of Medicine, Sun Yat-sen University, Guangzhou, China

*c* Laboratory of Molecular Imaging, Department of Radiology, Howard University, Washington DC 20060, USA

*\* These authors contributed equally to this work*

*# To whom correspondence should be addressed:*

Corresponding author. Tel.: +861082545569(O); fax: +861062656765. (Xing-Jie Liang)

Co-corresponding authors. Tel.: +862087332198; fax: +86 10 82545631.(Feng Li)

E-mail addresses: liangxj@nanoctr.cn (Xing-Jie Liang), lifeng@mail.sysu.edu.cn (Feng Li).

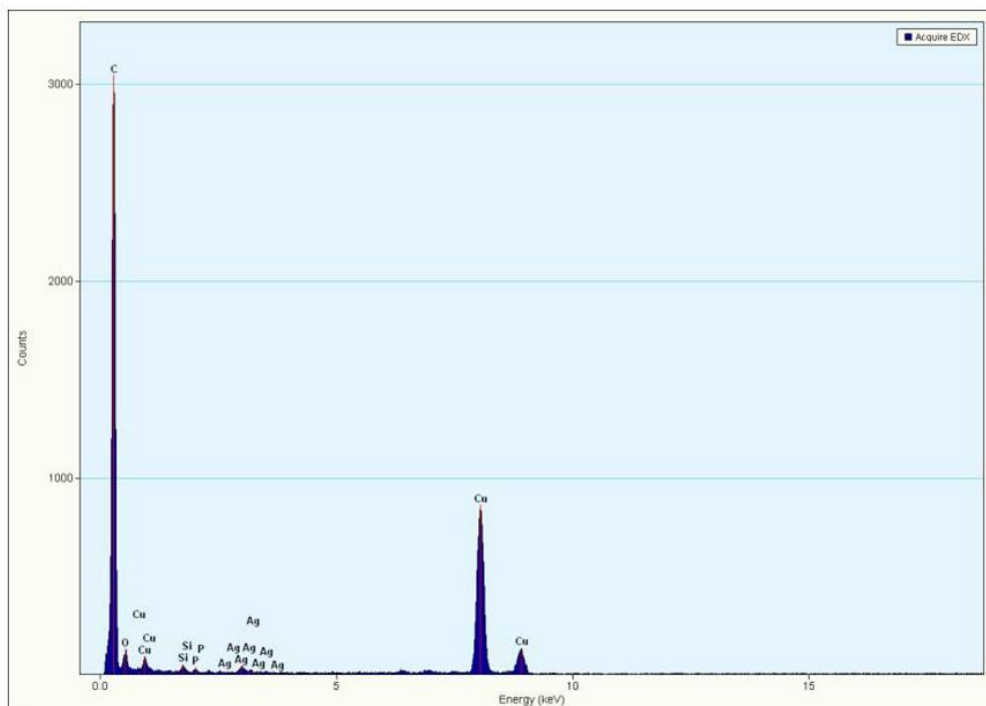

**Fig. S1** Energy-dispersive-X-ray spectroscopy (EDX) experiments confirm the presence of elemental Ag in DNA-Ag NC samples

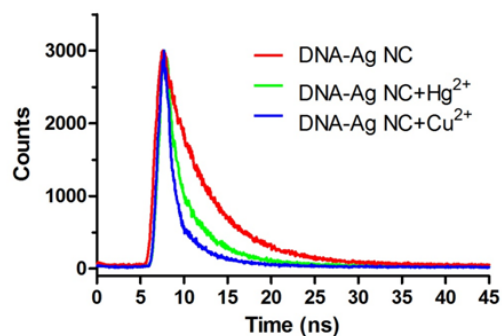

|                                  | $\tau_1$<br>[ns] | $\alpha_1$    | $\tau_2$<br>[ns] | $\alpha_2$    | $\tau_{av}$<br>[ns] |
|----------------------------------|------------------|---------------|------------------|---------------|---------------------|
| <b>DNA-Ag NC</b>                 | <b>5.4</b>       | <b>84.14%</b> | <b>2.6</b>       | <b>15.86%</b> | <b>5.0</b>          |
| <b>DNA-Ag NC+Hg<sup>2+</sup></b> | <b>4.2</b>       | <b>64.87%</b> | <b>7.4</b>       | <b>35.13%</b> | <b>5.4</b>          |
| <b>DNA-Ag NC+Cu<sup>2+</sup></b> | <b>3.9</b>       | <b>43.85%</b> | <b>6.2</b>       | <b>56.15%</b> | <b>5.2</b>          |

**Fig. S2** Fluorescence decay curves of DNA-Ag NCs in the absence (red) and presence of Hg<sup>2+</sup> (1  $\mu$ M, green) and Cu<sup>2+</sup> (1  $\mu$ M, blue), and the corresponding fit curves.

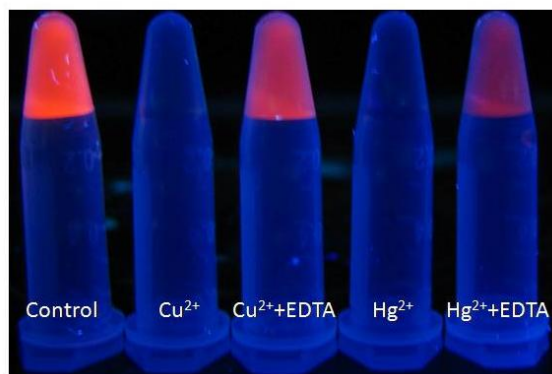

**Fig. S3** The DNA-Ag NC sensor system can be renewed using EDTA.

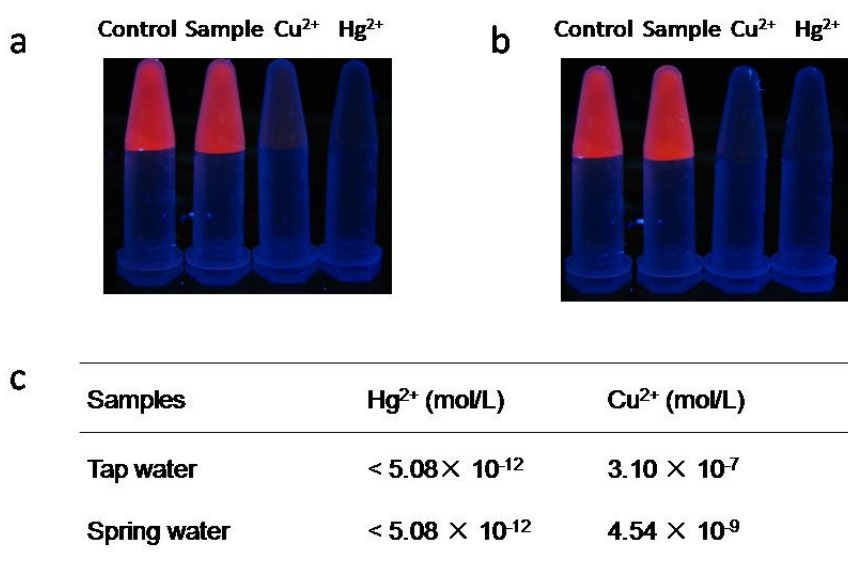

**Fig. S4** Determination of Hg<sup>2+</sup> and Cu<sup>2+</sup> in tap water (a) and spring water (b) samples with DNA-Ag NCs. (c) Determination of Hg<sup>2+</sup> and Cu<sup>2+</sup> concentrations in real water samples by ICP-MS analysis.
